# Supplementary material for: Template-free fabrication and growth mechanism of uniform (BiO)2CO3 hierarchical hollow microspheres with outstanding photocatalytic activities under both UV and visible light irradiation
Source: Royal Society of Chemistry journal article supplement (doi:10.1039/c1jm11840d), 2011-01-01
Supplement: c1jm11840d.pdf [file c1jm11840d.pdf]

Supplementary Material (ESI) for Journal of Materials Chemistry  
This journal is (c) The Royal Society of Chemistry 2010

**Template-free fabrication and growth mechanism of uniform  
(BiO)<sub>2</sub>CO<sub>3</sub> hierarchical hollow microspheres with outstanding  
photocatalytic activities under both UV and visible light irradiation**

Fan Dong,<sup>a,b,c</sup> Wing-Kei Ho,<sup>d</sup> S. C. Lee<sup>\*b</sup>, Zhongbiao Wu<sup>\*c</sup>, Min Fu,<sup>a</sup> Shichun Zou<sup>e</sup> and Yu Huang<sup>b</sup>

<sup>a</sup> College of Environmental and Biological Engineering, Chongqing Technology and Business University, Chongqing, 400067, P. R. China.

<sup>b</sup> Department of Civil and Structural Engineering, Research Center for Environmental Technology and Management, The Hong Kong Polytechnic University, Hong Kong, P. R. China.

<sup>c</sup> Department of Environmental Engineering, Zhejiang University, Hangzhou 310027, P. R. China.

<sup>d</sup> Nano and Advanced Materials Institute Limited, hosted by The Hong Kong University of Science and Technology, Hong Kong, P. R. China.

<sup>e</sup> School of Marine Sciences, Sun Yat-Sen University, Guangzhou, 510275, P. R. China.

\* To whom correspondence should be addressed. E-mail: ceslee@polyu.edu.hk, zbwu@zju.edu.cn

**Fig. S1** XRD pattern of the as-prepared (BiO)<sub>2</sub>CO<sub>3</sub> with particle morphology

**Fig. S2** SEM image of the as-prepared (BiO)<sub>2</sub>CO<sub>3</sub> with particle morphology

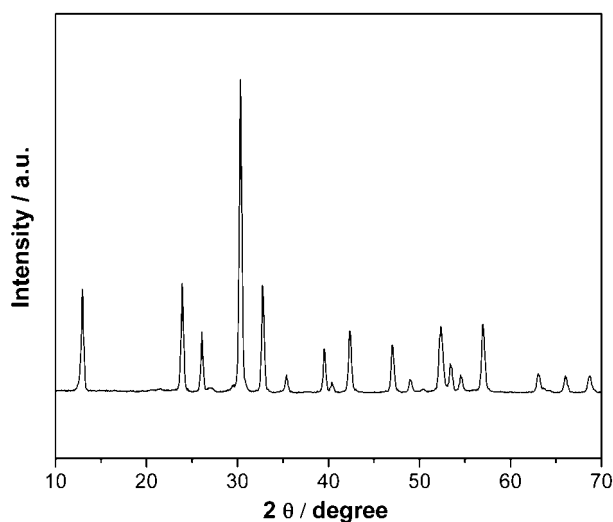

**Fig. S1** XRD pattern of the as-prepared (BiO)<sub>2</sub>CO<sub>3</sub> with particle morphology

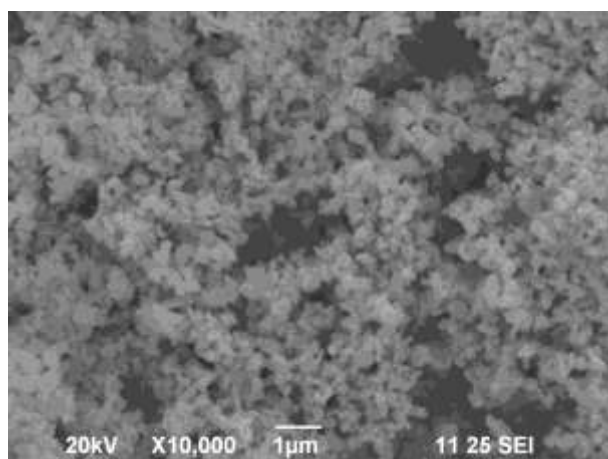

**Fig. S2** SEM image of the as-prepared (BiO)<sub>2</sub>CO<sub>3</sub> with particle morphology
